# Supplementary material for: Two-Stage Joint Model for Multivariate Longitudinal and Multistate Processes, with Application to Renal Transplantation Data
Source: Hindawi journal article supplement (doi:10.1155/2021/6641602), 2021-04-09
Supplement: f1 [file 6641602.f1.docx]

**Appendix A. Comparison of models**

The results of comparison of joint models and two-stage based models for jointly modeling a univariate longitudinal outcome and multi-state survival data, are presented in Table A.1. Moreover, the results of a multi-state model incorporating the estimation of the longitudinal biomarkers based on separated linear mixed effects models in comparison with a multi-state model incorporating the estimation of a multivariate linear mixed effects model are shown in Table A.2. The true values of the longitudinal biomarkers (explained in section 3) are used to define the association structure between longitudinal and multi-state processes.

**Table A.1.** Results of comparison of joint models and two-stage based models for each longitudinal biomarker separately.

| **(A) Simultaneous modeling of longitudinal creatinine measurements and multi-state survival data** | | | | | | | |
| --- | --- | --- | --- | --- | --- | --- | --- |
|  |  | **Joint model** | | | **Two-stage model** | | |
| **Variables** | **Coef (SE)** | **HR (95% CI)** | **p-value** | **Coef (SE)** | **HR (95% CI)** | **p-value** |
| **Transition 1 to 2** | **DRG** | 0.17 (0.11) | 1.18 (0.95, 1.47) | 0.122 | 0.11 (0.12) | 1.12 (0.88, 1.41) | 0.359 |
| **Recipient age** | 0.68 (0.28) | 1.97 (1.14, 3.42) | 0.015 | 0.67 (0.30) | 1.95 (1.08, 3.52) | 0.025 |
| **Creatinine** | 0.81 (0.27) | 2.25 (1.32, 3.81) | 0.003 | 0.71 (0.35) | 2.03 (1.02, 4.03) | 0.042 |
|  | | | | | | | |
| **Transition 2 to 3** | **DRG** | 0.16 (0.09) | 1.17 (0.98, 1.40) | 0.075 | 0.12 (0.11) | 1.13 (0.9, 1.41) | 0.298 |
| **Recipient age** | 0.31 (0.12) | 1.36 (1.08, 1.72) | 0.009 | 0.33 (0.14) | 1.39 (1.06, 1.83) | 0.018 |
| **Creatinine** | 0.38 (0.19) | 1.46 (1.01, 2.12) | 0.044 | 0.43 (0.21) | 1.54 (1.02, 2.32) | 0.041 |
|  | | | | | | | |
| **Transition 1 to 3** | **DRG** | -0.07 (0.12) | 0.93 (0.74, 1.18) | 0.559 | -0.22 (0.34) | 0.80 (0.41, 1.56) | 0.510 |
| **Recipient age** | 0.004 (0.01) | 1.00 (0.97, 1.03) | 0.771 | 0.03 (0.09) | 1.03 (0.86, 1.23) | 0.738 |
| **Creatinine** | 0.43 (0.23) | 1.54 (0.98, 2.41) | 0.061 | 0.61 (0.48) | 1.84 (0.72, 4.71) | 0.204 |
| **-2(Loglikelihood)** | | 5287.46 | | | 5323.97 | | |
| **(B) Simultaneous modeling of longitudinal hemoglobin measurements and multi-state survival data** | | | | | | | |
|  |  | **Joint model** | | | **Two-stage model** | | |
| **Variables** | **Coef (SE)** | **HR (95% CI)** | **p-value** | **Coef (SE)** | **HR (95% CI)** | **p-value** |
| **Transition 1 to 2** | **DRG** | 0.17 (0.09) | 1.18 (0.99, 1.41) | 0.059 | 0.14 (0.12) | 1.15 (0.91, 1.45) | 0.243 |
| **Recipient age** | 0.65 (0.30) | 1.91 (1.06, 3.45) | 0.030 | 0.68 (0.33) | 1.97 (1.03, 3.77) | 0.039 |
| **Hemoglobin** | -0.31 (0.11) | 0.73 (0.59, 0.91) | 0.005 | -0.50 (0.24) | 0.61 (0.38, 0.97) | 0.037 |
|  |  | | | | | | |
| **Transition 2 to 3** | **DRG** | 0.09 (0.05) | 1.09 (0.98, 1.22) | 0.095 | 0.001 (0.12) | 1.00 (0.80, 1.26) | 0.995 |
| **Recipient age** | 0.21 (0.09) | 1.23 (1.03, 1.47) | 0.020 | 0.23 (0.11) | 1.26 (1.01, 1.56) | 0.036 |
| **Hemoglobin** | -0.13 (0.04) | 0.88 (0.81, 0.95) | 0.001 | -0.40 (0.13) | 0.67 (0.52, 0.86) | 0.002 |
|  |  | | | | | | |
| **Transition 1 to 3** | **DRG** | -0.15 (0.34) | 0.86 (0.44, 1.69) | 0.660 | -0.10 (0.45) | 0.90 (0.37, 2.18) | 0.824 |
| **Recipient age** | 0.03 (0.06) | 1.03 (0.92, 1.16) | 0.617 | 0.03 (0.12) | 1.03 (0.81, 1.30) | 0.802 |
| **Hemoglobin** | 0.12 (0.09) | 1.13 (0.94, 1.34) | 0.182 | -0.19 (0.21) | 0.83 (0.55, 1.25) | 0.365 |
| **-2(Loglikelihood)** | | 4997.81 | | | 5086.79 | | |
| **(C) Simultaneous modeling of longitudinal BUN measurements and multi-state survival data** | | | | | | | |
|  |  | **Joint model** | | | **Two-stage model** | | |
| **Variables** | **Coef (SE)** | **HR (95% CI)** | **p-value** | **Coef (SE)** | **HR (95% CI)** | **p-value** |
| **Transition 1 to 2** | **DRG** | 0.18 (0.10) | 1.20 (0.98, 1.46) | 0.072 | 0.11 (0.11) | 1.12 (0.91, 1.38) | 0.290 |
| **Recipient age** | 0.09 (0.04) | 1.09 (1.01, 1.18) | 0.024 | 0.11 (0.05) | 1.12 (1.01, 1.23) | 0.027 |
| **BUN** | 0.24 (0.09) | 1.27 (1.06, 1.52) | 0.008 | 0.20 (0.10) | 1.23 (0.99, 1.50) | 0.046 |
|  |  | | | | | | |
| **Transition 2 to 3** | **DRG** | 0.21 (0.14) | 1.23 (0.94, 1.62) | 0.134 | 0.20 (0.16) | 1.22 (0.89, 1.67) | 0.211 |
| **Recipient age** | 0.16 (0.05) | 1.17 (1.02, 1.35) | 0.022 | 0.13 (0.06) | 1.14 (1.01, 1.28) | 0.030 |
| **BUN** | 0.14 (0.08) | 1.15 (0.98, 1.34) | 0.080 | 0.22 (0.13) | 1.25 (0.97, 1.61) | 0.091 |
|  |  | | | | | | |
| **Transition 1 to 3** | **DRG** | -0.39 (0.31) | 0.68 (0.37, 1.24) | 0.208 | -0.42 (0.35) | 0.66 (0.33, 1.29) | 0.223 |
| **Recipient age** | 0.002 (0.01) | 1.00 (0.98, 1.02) | 0.841 | 0.003 (0.01) | 1.00 (0.98, 1.02) | 0.764 |
| **BUN** | -0.01 (0.01) | 0.99 (0.97, 1.01) | 0.317 | 0.02 (0.03) | 1.02 (0.96, 1.08) | 0.504 |
| **-2(Likelihood)** | | 5301.19 | | | 5383.00 | | |

**Table A.2.** The results of comparison of two multi-state models which included the estimation of the longitudinal biomarkers based on separated linear mixed effects models (Model 1) and a multivariate linear mixed effects model (Model 2) for longitudinal biomarkers.

| **Model 1** | | | | | | | | | |
| --- | --- | --- | --- | --- | --- | --- | --- | --- | --- |
|  | **Transition 1 to 2** | | | **Transition 2 to 3** | | | **Transition 1 to 3** | | |
| **Variables** | **Coef (SE)** | **HR (95% CI)** | **p-value** | **Coef (SE)** | **HR (95% CI)** | **p-value** | **Coef (SE)** | **HR (95% CI)** | **p-value** |
| **DRG** | 0.08 (0.11) | 1.07 (0.87, 1.33) | 0.501 | -0.003 (0.12) | 0.99 (0.79, 1.25) | 0.980 | -0.21 (0.35) | 0.81 (0.41, 1.62) | 0.556 |
| **Recipient age** | -0.01 (0.04) | 0.99 (0.91, 1.07) | 0.802 | 0.02 (0.004) | 1.02 (1.01, 1.03) | 0.001 | 0.007 (0.01) | 1.01 (0.98, 1.03) | 0.585 |
| **Creatinine** | 0.28 (0.15) | 1.32 (0.99, 1.77) | 0.062 | 0.35 (0.22) | 1.42 (0.92, 2.18) | 0.112 | 0.18 (0.34) | 1.19 (0.61, 2.33) | 0.604 |
| **Hemoglobin** | -0.46 (0.15) | 0.63 (0.47, 0.85) | 0.002 | -0.21 (0.12) | 0.81 (0.64, 1.03) | 0.080 | -0.09 (0.09) | 0.91 (0.77, 1.09) | 0.311 |
| **BUN** | 0.03 (0.01) | 1.03 (1.01, 1.05) | 0.003 | -0.01 (0.006) | 0.99 (0.98, 1.00) | 0.121 | -0.004 (0.01) | 0.99 (0.98, 1.01) | 0.499 |
| **-2(Loglikelihood)** | 5190.45 | | | | | | | | |
| **Model 2** | | | | | | | | | |
|  | **Transition 1 to 2** | | | **Transition 2 to 3** | | | **Transition 1 to 3** | | |
| **Variables** | **Coef (SE)** | **HR (95% CI)** | **p-value** | **Coef (SE)** | **HR (95% CI)** | **p-value** | **Coef (SE)** | **HR (95% CI)** | **p-value** |
| **DRG** | 0.02 (0.11) | 1.02 (0.83, 1.27) | 0.837 | -0.07 (0.12) | 0.93 (0.74, 1.18) | 0.554 | -0.17 (0.37) | 0.85 (0.41, 0.74) | 0.651 |
| **Recipient age** | -0.02 (0.02) | 0.98 (0.94, 1.02) | 0.317 | 0.12 (0.05) | 1.13 (1.02,1.24) | 0.016 | 0.01 (0.02) | 1.01 (0.97, 1.05) | 0.617 |
| **Creatinine** | 0.45 (0.22) | 1.57 (1.02, 2.41) | 0.040 | 0.13 (0.26) | 1.14 (0.68, 1.89) | 0.617 | 0.67 (0.35) | 1.95 (0.98, 3.88) | 0.055 |
| **Hemoglobin** | -0.68 (0.05) | 0.51 (0.46, 0.56) | <0.001 | -0.44 (0.22) | 0.64 (0.42, 0.99) | 0.045 | -0.06 (0.07) | 0.94 (0.82, 1.09) | 0.454 |
| **BUN** | 0.12 (0.05) | 1.13 (1.02, 1.24) | 0.016 | 0.01 (0.01) | 1.01 (0.99, 1.03) | 0.317 | -0.01 (0.01) | 0.99 (0.97, 1.01) | 0.381 |
| **-2(Loglikelihood)** | 5061.89 | | | | | | | | |
